# Supplementary material for: Influence of water content on the [2σ+2σ+2π] cycloaddition of dimethyl azodicarboxylate with quadricyclane in mixed methanol–water solvents from QM/MM Monte Carlo simulations
Source: Royal Society of Chemistry journal article supplement (doi:10.1039/d1cp01973b), 2021-01-01
Supplement: d1cp01973b1.pdf [file d1cp01973b1.pdf]

## Supporting Information

### **Influence of water content on the [2 $\sigma$ +2 $\sigma$ +2 $\pi$ ] cycloaddition of dimethyl azodicarboxylate with quadriayclane in mixed methanol-water solvents from QM/MM Monte Carlo simulations**

Lian Yang<sup>#</sup>, Xudong Liu<sup>#</sup>, Yan Zhang, Yongsheng Yang, Ying Xue<sup>\*</sup>

College of Chemistry,  
Key Lab of Green Chemistry and Technology in Ministry of Education,  
Sichuan University, Chengdu 610064,  
People's Republic of China

---

<sup>#</sup>These authors contributed equally to this work.

## Content:

### Part 1. The other figures

|                                                                                                                                                                                                                                                                                                                                                 |     |
|-------------------------------------------------------------------------------------------------------------------------------------------------------------------------------------------------------------------------------------------------------------------------------------------------------------------------------------------------|-----|
| <b>Fig. S1.</b> Illustration MC configuration for the transition structure in methanol for the $[2\sigma+2\sigma+2\pi]$ cycloaddition reaction between quadricyclane and dimethyl azodicarboxylate.....                                                                                                                                         | S3  |
| <b>Fig. S2.</b> Illustration MC configuration for the transition structure in methanol-water mixture (MeOH:H <sub>2</sub> O=3:1) for the $[2\sigma+2\sigma+2\pi]$ cycloaddition reaction between quadricyclane and dimethyl azodicarboxylate.....                                                                                               | S4  |
| <b>Fig. S3.</b> Illustration MC configuration for the transition structure in methanol-water mixture (MeOH:H <sub>2</sub> O=1:1) for the $[2\sigma+2\sigma+2\pi]$ cycloaddition reaction between quadricyclane and dimethyl azodicarboxylate.....                                                                                               | S5  |
| <b>Fig. S4.</b> Illustration MC configuration for the transition structure in methanol-water mixture (MeOH:H <sub>2</sub> O=1:3) for the $[2\sigma+2\sigma+2\pi]$ cycloaddition reaction between quadricyclane and dimethyl azodicarboxylate.....                                                                                               | S6  |
| <b>Fig. S5.</b> Two-dimensional free energy map for the quadriayclane with dimethyl azodicarboxylate on the surface of the water slab in 0 °C and 1 atm. RC1 and RC2 are in Angstroms, and the free energies in the legend are relative to the product in kcal.mol <sup>-1</sup> .....                                                          | S7  |
| <b>Fig. S6.</b> Two-dimensional free energy map for the quadriayclane with dimethyl azodicarboxylate in methanol at 23 °C and 1 atm. RC1 and RC2 are in Angstroms, and the free energies in the legend are relative to the product in kcal.mol <sup>-1</sup> .....                                                                              | S8  |
| <b>Fig. S7.</b> Two-dimensional free energy map for the quadriayclane with dimethyl azodicarboxylate in methanol-water mixture (MeOH:H <sub>2</sub> O=3:1) at 23 °C and 1 atm. RC1 and RC2 are in Angstroms, and the free energies in the legend are relative to the product in kcal.mol <sup>-1</sup> .....                                    | S9  |
| <b>Fig. S8.</b> Two-dimensional free energy map for the quadriayclane with dimethyl azodicarboxylate in methanol-water mixture (MeOH:H <sub>2</sub> O=1:1) at 23 °C and 1 atm. RC1 and RC2 are in Angstroms, and the free energies in the legend are relative to the product in kcal.mol <sup>-1</sup> .....                                    | S10 |
| <b>Fig. S9.</b> Two-dimensional free energy map for the quadriayclane with dimethyl azodicarboxylate in methanol-water mixture (MeOH:H <sub>2</sub> O=1:3) at 23 °C and 1 atm. RC1 and RC2 are in Angstroms, and the free energies in the legend are relative to the product in kcal.mol <sup>-1</sup> .....                                    | S11 |
| <b>Fig. S10.</b> Computed O (in C=O of dimethyl azodicarboxylate)-H(solvent) radial distribution functions for the reaction of <b>1</b> and <b>2</b> : 7O atom in transition structure (dash black), 7O atom in reactant (solid black), 4O atom in transition structure (dash red), and 4O atom in reactant (solid red) at 23 °C and 1 atm..... | S12 |
| <b>Part 2. Reaction mechanism and solvent effects studied by DFT calculations.....</b>                                                                                                                                                                                                                                                          | S13 |
| 2.1 Computational details                                                                                                                                                                                                                                                                                                                       |     |
| 2.2 Discussion                                                                                                                                                                                                                                                                                                                                  |     |
| 2.3 References                                                                                                                                                                                                                                                                                                                                  |     |
| <b>Part 3. Cartesian coordinates of all stationary points optimized in condensed-phases at the B3LYP/SMD/6-31+G(d,p) level.....</b>                                                                                                                                                                                                             | S18 |

## Part 1. The other figures

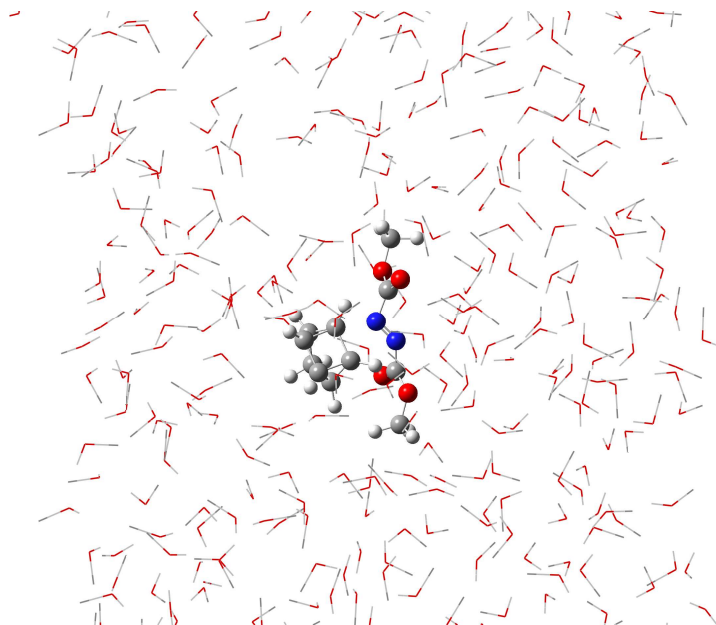

**Fig. S1.** Illustration MC configuration for the transition structure in methanol for the  $[2\sigma+2\sigma+2\pi]$  cycloaddition reaction between quadricyclane and dimethyl azodicarboxylate.

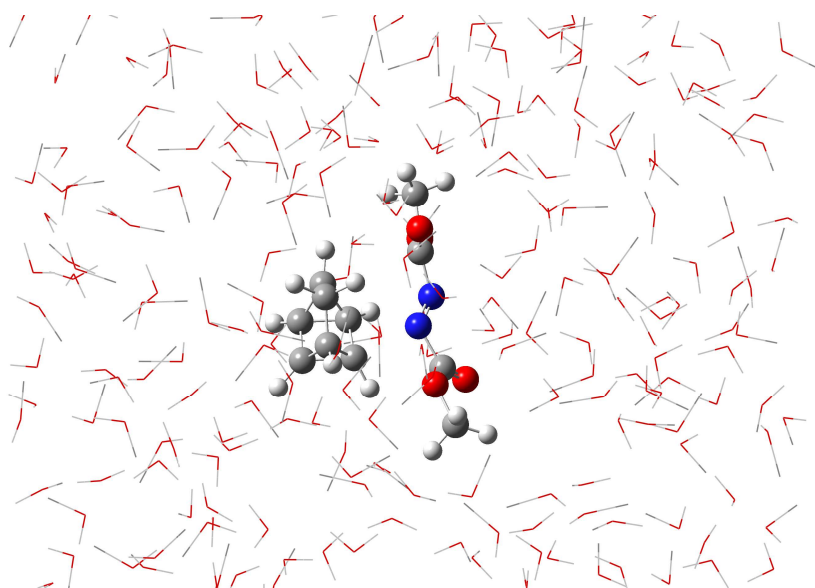

**Fig. S2.** Illustration MC configuration for the transition structure in methanol-water mixture (MeOH:H<sub>2</sub>O=3:1) for the  $[2\sigma+2\sigma+2\pi]$  cycloaddition reaction between quadricyclane and dimethyl azodicarboxylate.

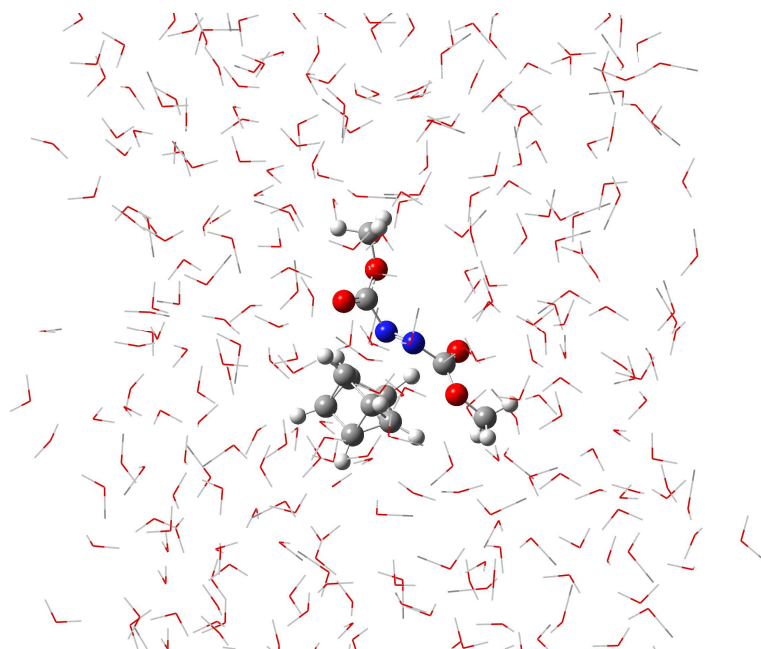

**Fig. S3.** Illustration MC configuration for the transition structure in methanol-water mixture (MeOH:H<sub>2</sub>O=1:1) for the  $[2\sigma+2\sigma+2\pi]$  cycloaddition reaction between quadricyclane and dimethyl azodicarboxylate.

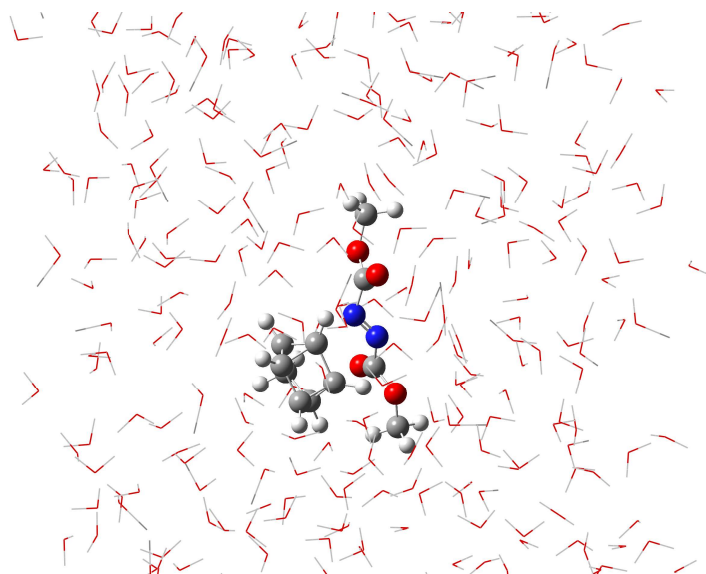

**Fig. S4.** Illustration MC configuration for the transition structure in methanol-water mixture (MeOH:H<sub>2</sub>O=1:3) for the [2σ+2σ+2π] cycloaddition reaction between quadricyclane and dimethyl azodicarboxylate.

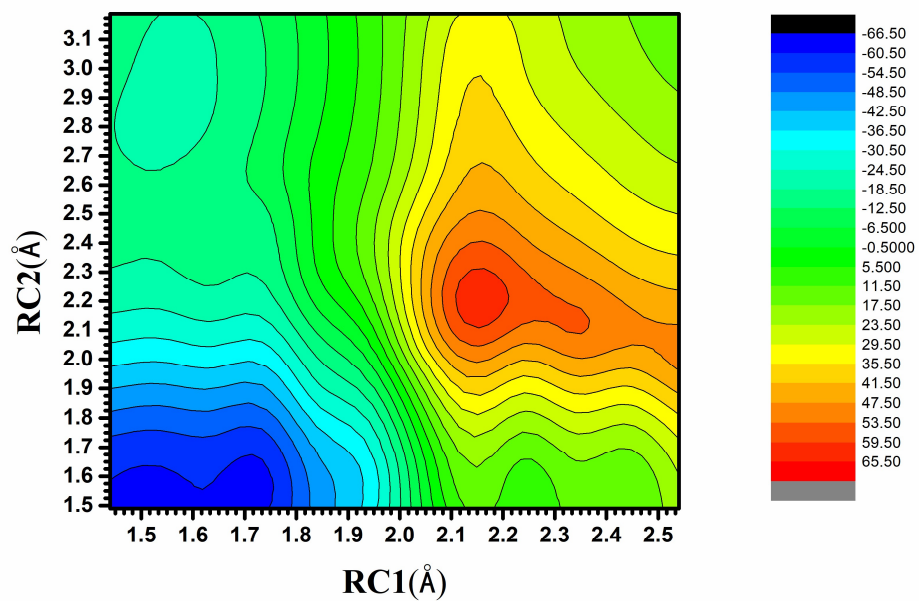

**Fig. S5.** Two-dimensional free energy map for the quadriacyclane with dimethyl azodicarboxylate on the surface of the water slab in 0 °C and 1 atm. RC1 and RC2 are in Angstroms, and the free energies in the legend are relative to the product in kcal.mol<sup>-1</sup>.

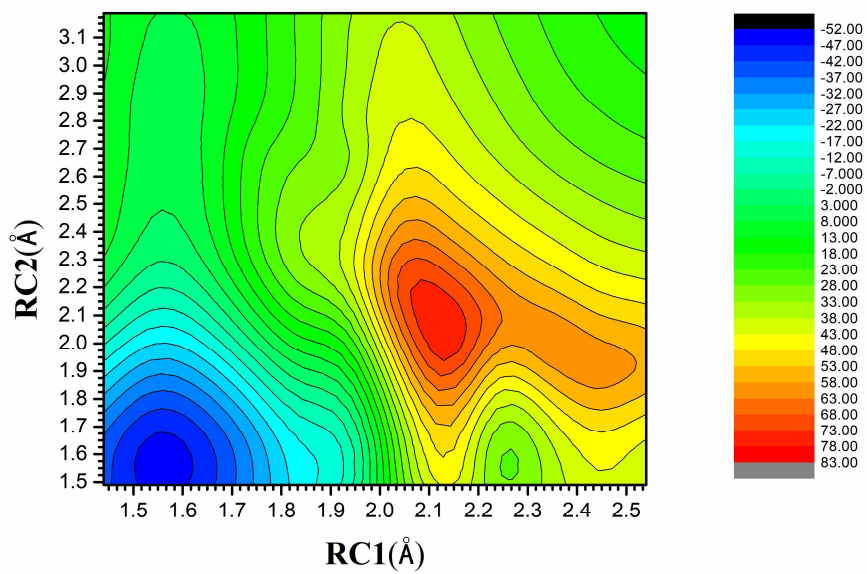

**Fig. S6.** Two-dimensional free energy map for the quadriayclane with dimethyl azodicarboxylate in methanol at 23 °C and 1 atm. RC1 and RC2 are in Angstroms, and the free energies in the legend are relative to the product in kcal.mol<sup>-1</sup>.



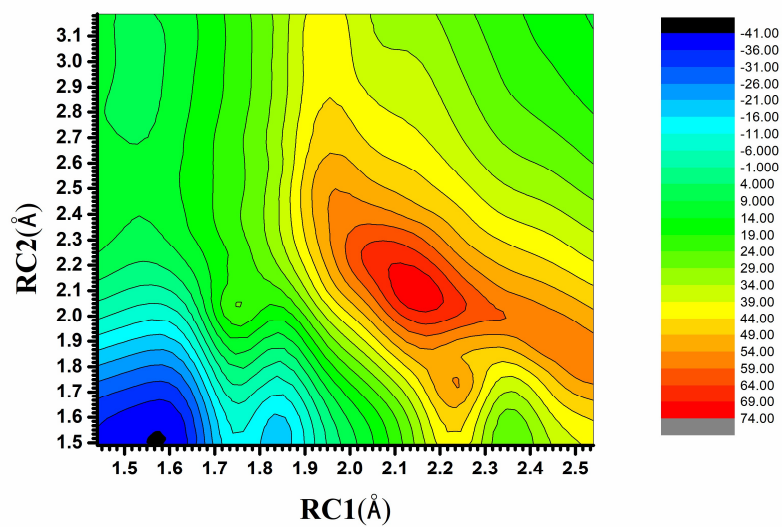

**Fig. S7.** Two-dimensional free energy map for the quadriayclane with dimethyl azodicarboxylate in methanol-water mixtures (MeOH:H<sub>2</sub>O=3:1) at 23 °C and 1 atm. RC1 and RC2 are in Angstroms, and the free energies in the legend are relative to the product in kcal.mol<sup>-1</sup>.

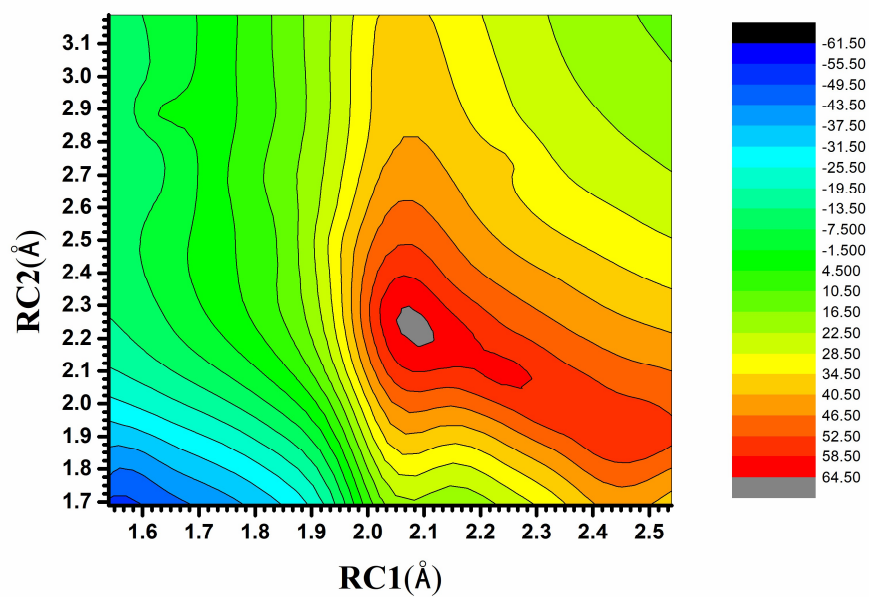

**Fig. S8.** Two-dimensional free energy map for the quadriayclane with dimethyl azodicarboxylate in methanol-water mixtures (MeOH:H<sub>2</sub>O=1:1) at 23 °C and 1 atm. RC1 and RC2 are in Angstroms, and the free energies in the legend are relative to the product in kcal.mol<sup>-1</sup>.

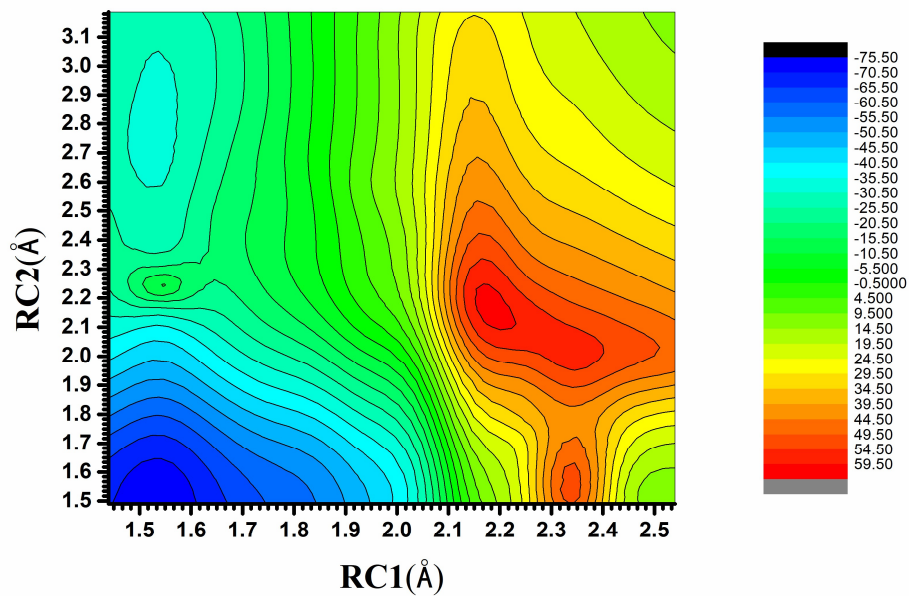

**Fig. S9.** Two-dimensional free energy map for the quadriayclane with dimethyl azodicarboxylate in methanol-water mixtures (MeOH:H<sub>2</sub>O=1:3) at 23 °C and 1 atm. RC1 and RC2 are in Angstroms, and the free energies in the legend are relative to the product in kcal.mol<sup>-1</sup>.

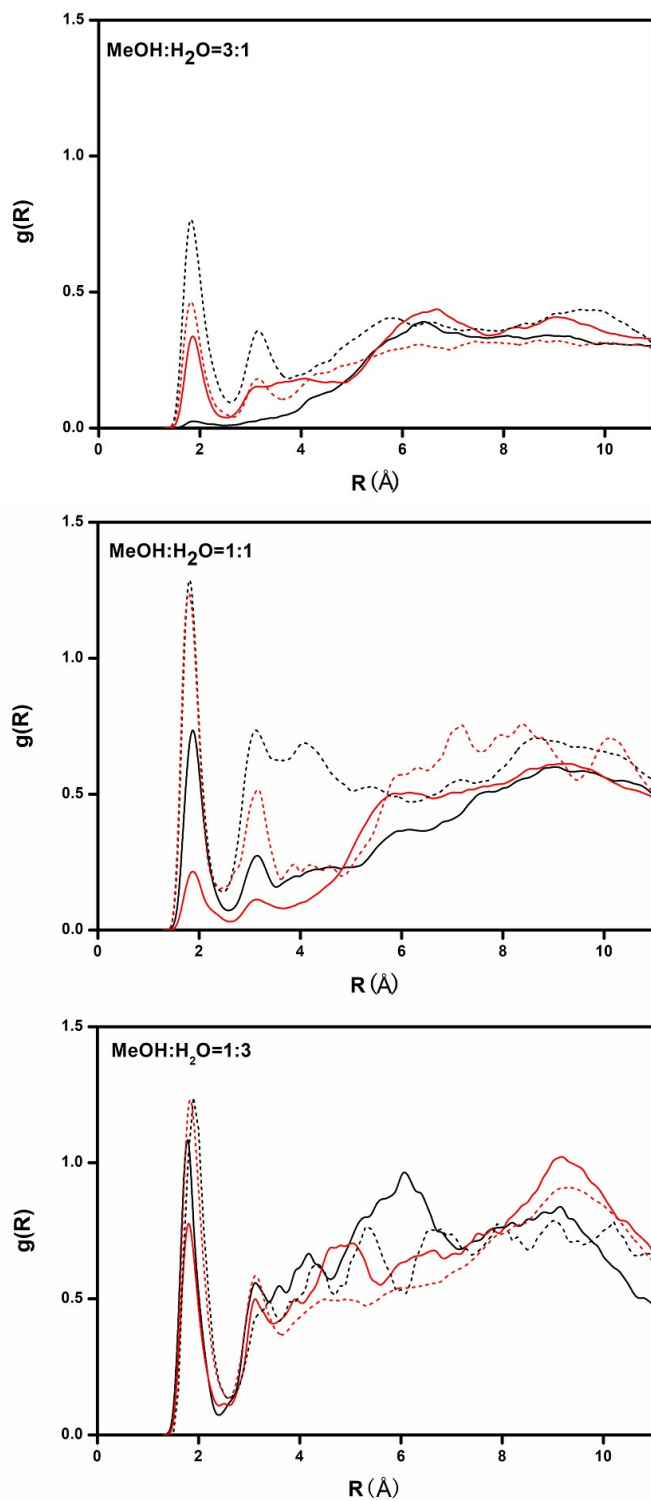

**Fig. S10.** Computed O (in C=O of dimethyl azodicarboxylate)-H(solvent) radial distribution functions for the reaction of **1** and **2**: 7O atom in transition structure (dash black), 7O atom in reactant (solid black), 4O atom in transition structure (dash red), and 4O atom in reactant (solid red) at 23 °C and 1 atm.

## Part 2. Reaction mechanism and solvent effects studied by DFT calculations

### 2.1 Computational details

The density functional theory (DFT) B3LYP<sup>1,2</sup> method with the 6-31+G(d,p) basis set was used to characterize the ground state structures and the transition state structures in the solvent phases by Gaussian 09 program.<sup>3</sup> The harmonic frequencies were computed at the same level of theory as that used in geometry optimizations to identify all stationary points as minima with zero imaginary frequency or transition states with only one imaginary frequency and derive the thermochemical corrections at a temperature of 296.15 K (23 °C) or 273.15 K (0 °C) and pressure of 1 atm. The energy profiles connecting transition structures to the two associated minima were checked by the intrinsic reaction coordinate (IRC).<sup>4</sup> The solvent effects in two pure solvents (water and methanol) were simulated by the self-consistent reaction field (SCRF) based on the solvation SMD polarizable continuum model.<sup>5,6</sup> What's more, the single-point energy calculations were performed at the M06-2X/SMD/6-311++G(d,p) level by using the B3LYP/SMD/6-31+G(d,p) optimized structures.

### 2.2 Discussion

The reaction mechanism for the  $[2\sigma+2\sigma+2\pi]$  cycloaddition reaction between quadriacyclane and dimethyl azodicarboxylate in two different solvents (water and methanol) were simulated by using the DFT method. The free energy profile and the stationary point structures of the reaction in water are depicted in **Fig. S11**. The bond lengths of RC1 and RC2 are 2.24 and 2.78 Å in water, respectively. According to the geometric changes along the IRC, the two new bonds are formed in an asynchronous manner that the RC1 attack occurs first, and followed by the RC2. Consequently, the reaction occurs through a collaborative asynchronous mechanism, and the RC1 forming is obviously more prior than the forming of RC2. The computed results also show the reaction in methanol has the same

one-step mechanism as in water. The bond lengths of RC1 and RC2 for transition state in methanol are 2.22 and 2.77 Å, respectively. The free energy barriers of activation,  $\Delta G^\ddagger$ , for the reaction in different solvents are listed in **Table S1**.

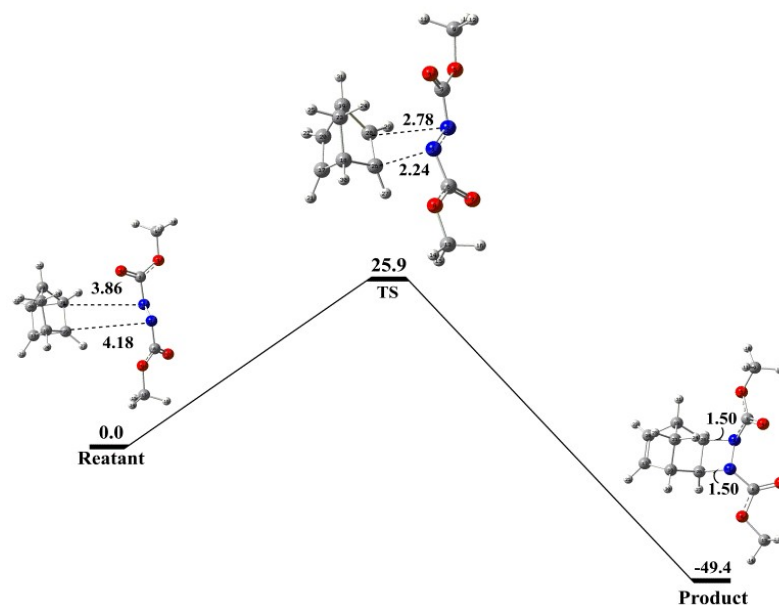

**Fig. S11.** Free energy profile for  $[2\sigma+2\sigma+2\pi]$  cycloaddition reaction of quadricyclane with dimethyl azodicarboxylate in water. Energies are given in  $\text{kcal mol}^{-1}$  and the bond lengths in Å.

**Table S1.** Free energies of activation,  $\Delta G^\ddagger$  ( $\text{kcal}\cdot\text{mol}^{-1}$ ), for the  $[2\sigma+2\sigma+2\pi]$  cycloaddition reaction of **1** with **2** in solution phases.

| solvent                                           | SMD <sup>a</sup> | Time to completion <sup>b</sup> |
|---------------------------------------------------|------------------|---------------------------------|
| CH <sub>3</sub> OH                                | 25.2             | 18 h                            |
| CH <sub>3</sub> OH/H <sub>2</sub> O (3:1)         | —                | 4 h                             |
| CH <sub>3</sub> OH/H <sub>2</sub> O (1:1)         | —                | 10 min                          |
| CH <sub>3</sub> OH/H <sub>2</sub> O (1:3)         | —                | 10 min                          |
| H <sub>2</sub> O ( $T=23\text{ }^\circ\text{C}$ ) | 25.9             | 10 min                          |
| H <sub>2</sub> O ( $T=0\text{ }^\circ\text{C}$ )  | 24.8             | 1.5 h                           |

a: Obtained by using the M06-2X/SMD/6-311++G(d,p)// B3LYP/SMD/6-31+G(d,p) method.

b: The experimental results are taken from Reference 7.

One can see from **Table S1** that the  $\Delta G^\ddagger$  values have the order of 25.9 (in H<sub>2</sub>O ( $T=23^\circ\text{C}$ )) > 25.2 (in CH<sub>3</sub>OH) > 24.8 kcal/mol (in H<sub>2</sub>O ( $T=0^\circ\text{C}$ )). There is no doubt that this order of activation free energy is disagreed with the change trend of reaction rate observed in the experiment,<sup>7</sup> where the reaction time at the same reaction progress in the different

solvent conditions has the sequence of “in CH<sub>3</sub>OH” > “on H<sub>2</sub>O (*T*=0 °C)” > “on H<sub>2</sub>O (*T*=23°C)”. This indicates that the DFT calculations using the implicit SMD model are unsuited to reproduce the experimental rate trend of the [2σ+2σ+2π] cycloaddition reaction between quadriayclane and dimethyl azodicarboxylate in water and CH<sub>3</sub>OH. In fact, some investigations using the DFT methods and the polarizable continuum solvation models also failed to represent the accurate sequence of rates of reactions for the 1,3-dipolar cycloadditions,<sup>8</sup> Claisen rearrangements,<sup>9</sup> the uncatalyzed aldol reaction,<sup>10</sup> and the allyl *p*-tolyl ether rearrangement<sup>11</sup> in solutions. Thus, it should be realized that the continuum treatment of the solvent effects could not reflect the specific changes of hydrogen bond interactions between molecules of reaction system and solvents along the reaction pathway, which are important to the reaction under an “on water” environment. Therefore, the QM/MM/MC simulations were performed for the title reaction under the different solution conditions: on water, in CH<sub>3</sub>OH, and in the mixed methanol-water solvents with three proportions to gain the detailed and explicit solvent representation.

### 1.3 References

1. C. Lee, W. Yang, R.G. Parr, Development of the Colle-Salvetti correlation-energy formula into a functional of the electron density, *Phys. Rev. B*, 1988, **37**, 785–789.
2. A.D. Becke, Density-functional thermochemistry. III. The role of exact exchange, *J. Chem. Phys.*, 1993, **98**, 5648–5652.
3. M.J. Frisch, G.W. Trucks, H.B. Schlegel, G.E. Scuseria, M.A. Robb, J.R. Cheeseman, G. Scalmani, V. Barone, B. Mennucci, G.A. Petersson, H. Nakatsuji, M. Caricato, X. Li, H.P. Hratchian, A.F. Izmaylov, J. Bloino, G. Zheng, J.L. Sonnenberg, M. Hada, M. Ehara, K. Toyota, R. Fukuda, J. Hasegawa, M. Ishida, T. Nakajima, Y. Honda, O. Kitao, H. Nakai, T. Vreven, J.A. Montgomery Jr, J.E. Peralta, F. Ogliaro, M. Bearpark, J.J. Heyd, E. Brothers, K.N. Kudin, V.N. Staroverov, T. Keith, R. Kobayashi, J. Normand, K. Raghavachari, A.

Rendell, J.C. Burant, S.S. Iyengar, J. Tomasi, M. Cossi, N. Rega, J.M. Millam, M. Klene, J.E. Knox, J.B. Cross, V. Bakken, C. Adamo, J. Jaramillo, R. Gomperts, R.E. Stratmann, O. Yazyev, A.J. Austin, R. Cammi, C. Pomelli, J.W. Ochterski, R.L. Martin, K. Morokuma, V.G. Zakrzewski, G.A. Voth, P. Salvador, J.J. Dannenberg, S. Dapprich, A.D. Daniels, O. Farkas, J.B. Foresman, J.V. Ortiz, J. Cioslowski, D.J. Fox, *Gaussian 09, Revision D.01*, Gaussian, Wallingford CT, 2010.

4. C. Gonzalez, H.B. Schlegel, Reaction path following in mass-weighted internal coordinates, *J. Phys. Chem.*, 1990, **94**, 5523–5527.

5. R.F. Ribeiro, A.V. Marenich, C.J. Cramer and D.G. Truhlar, Use of Solution-Phase Vibrational Frequencies in Continuum Models for the Free Energy of Solvation, *J. Phys. Chem. B*, 2011, **115**, 14556–14562.

6. A.V. Marenich, C.J. Cramer, D.G. Truhlar, Universal Solvation Model Based on Solute Electron Density and on a Continuum Model of the Solvent Defined by the Bulk Dielectric Constant and Atomic Surface Tensions, *J. Phys. Chem. B*, 2009, **113**, 6378–6396.

7. S. Narayan, J. Muldoon, M.G. Finn, V.V. Fokin, H.C. Kolb, K.B. Sharpless, “On Water”: Unique Reactivity of Organic Compounds in Aqueous Suspension, *Angew. Chem., Int. Ed.*, 2005, **44**, 3275–3279.

8. X. Yang, Y. Xue, QM/MM investigation on 1,3-dipolar cycloadditions of the phthalazinium dicyanomethanide with three different dipolarophiles on water and in solution, *Phys. Chem. Chem. Phys.*, 2013, **15**, 11846–11855.

9. O. Acevedo, K. Armacost, Claisen Rearrangements: Insight into Solvent Effects and “on Water” Reactivity from QM/MM Simulations, *J. Am. Chem. Soc.*, 2010, **132**, 1966–1975.

10. J.M. Zhao, F. He, F. Zhang, X. Yang, Z.Y. Tian, Y. Xue, The role of water in the catalyst-free aldol reaction of water-insoluble *n*-methyl-2,4-thiazolidinedione with *n*-methylisatin from QM/MM Monte Carlo simulations, *ChemPhysChem*, 2017, **18**, 2123–2131.



11. M. Irani, M. Haqgu, A. Talebi, M.R. Gholami, A joint experimental and theoretical study of kinetic and mechanism of rearrangement of allyl *p*-tolyl ether, *J. Mol. Struct. (THEOCHEM)*, 2009, **893**, 73-76.

**Part 3. Cartesian coordinates of all stationary points optimized in condensed-phases at the B3LYP/SMD/6-31+G(d,p) level**

**in water**

**Quadricyclane(QDC)**

**at 23 °C**

|                                              |             |
|----------------------------------------------|-------------|
| Sum of electronic and zero-point Energies=   | -271.340539 |
| Sum of electronic and thermal Energies=      | -271.335949 |
| Sum of electronic and thermal Enthalpies=    | -271.335011 |
| Sum of electronic and thermal Free Energies= | -271.368218 |

**at 0 °C**

|                                              |             |
|----------------------------------------------|-------------|
| Sum of electronic and zero-point Energies=   | -271.340539 |
| Sum of electronic and thermal Energies=      | -271.336645 |
| Sum of electronic and thermal Enthalpies=    | -271.335780 |
| Sum of electronic and thermal Free Energies= | -271.365671 |

|   |          |          |          |
|---|----------|----------|----------|
| C | -0.77567 | 0.71043  | 0.75923  |
| C | -1.15454 | -0.55156 | -0.00004 |
| C | 1.15426  | -0.55199 | 0.00011  |
| C | 0.77585  | 0.71004  | 0.75937  |
| H | -1.42816 | 1.23311  | 1.44912  |
| H | 1.42867  | 1.23284  | 1.44884  |
| C | -0.00038 | -1.54016 | 0.00003  |
| H | -0.00023 | -2.18064 | -0.89070 |
| H | -0.0006  | -2.18146 | 0.89015  |
| C | -0.77554 | 0.71036  | -0.75938 |
| H | -1.42793 | 1.23312  | -1.44930 |
| C | 0.77602  | 0.70997  | -0.75927 |
| H | 1.42882  | 1.23249  | -1.44897 |
| H | -2.19085 | -0.87523 | 0.00029  |
| H | 2.19023  | -0.87676 | 0.00029  |

**Dimethyl azodicarboxylate(DMAD)**

**at 23 °C**

|                                              |             |
|----------------------------------------------|-------------|
| Sum of electronic and zero-point Energies=   | -566.310069 |
| Sum of electronic and thermal Energies=      | -566.299246 |
| Sum of electronic and thermal Enthalpies=    | -566.298308 |
| Sum of electronic and thermal Free Energies= | -566.348450 |

**at 0 °C**

|                                              |             |
|----------------------------------------------|-------------|
| Sum of electronic and zero-point Energies=   | -566.310069 |
| Sum of electronic and thermal Energies=      | -566.300510 |
| Sum of electronic and thermal Enthalpies=    | -566.299645 |
| Sum of electronic and thermal Free Energies= | -566.344609 |

|   |          |          |          |
|---|----------|----------|----------|
| N | -0.42172 | 0.03754  | 0.65557  |
| N | 0.35122  | 0.03719  | -0.3155  |
| C | 1.72321  | -0.28367 | 0.08167  |
| O | 2.01332  | -1.1667  | 0.86072  |
| O | 2.53544  | 0.49171  | -0.60806 |
| C | -1.78433 | 0.36016  | 0.28547  |
| O | -2.24971 | 1.44639  | 0.56361  |
| O | -2.38365 | -0.67223 | -0.26761 |
| C | 3.96421  | 0.31224  | -0.37721 |
| H | 4.44549  | 1.03429  | -1.03311 |
| H | 4.19281  | 0.52093  | 0.66889  |
| H | 4.24612  | -0.70776 | -0.64251 |
| C | -3.79637 | -0.50687 | -0.60587 |
| H | -4.09342 | -1.46443 | -1.02774 |
| H | -4.36293 | -0.28447 | 0.29929  |
| H | -3.8981  | 0.29396  | -1.33913 |

### Transition state

#### at 23 °C

|                                              |             |
|----------------------------------------------|-------------|
| Sum of electronic and zero-point Energies=   | -837.631547 |
| Sum of electronic and thermal Energies=      | -837.615495 |
| Sum of electronic and thermal Enthalpies=    | -837.614557 |
| Sum of electronic and thermal Free Energies= | -837.675802 |

#### at 0 °C

|                                              |             |
|----------------------------------------------|-------------|
| Sum of electronic and zero-point Energies=   | -837.631547 |
| Sum of electronic and thermal Energies=      | -837.617612 |
| Sum of electronic and thermal Enthalpies=    | -837.616747 |
| Sum of electronic and thermal Free Energies= | -837.671134 |

|   |          |          |          |
|---|----------|----------|----------|
| N | -0.5288  | -0.93603 | 0.31952  |
| N | 0.4611   | -1.37692 | -0.41382 |
| C | 1.68961  | -1.27991 | 0.24643  |
| O | 1.91099  | -0.98633 | 1.42148  |
| O | 2.6668   | -1.65324 | -0.61324 |
| C | -1.78788 | -1.3721  | -0.18085 |
| O | -1.99837 | -2.06508 | -1.16883 |
| O | -2.74733 | -0.9616  | 0.66372  |
| C | 4.00558  | -1.71342 | -0.07523 |
| H | 4.6303   | -2.05864 | -0.89829 |
| H | 4.32971  | -0.72398 | 0.25571  |
| H | 4.04893  | -2.42027 | 0.75671  |
| C | -4.10344 | -1.33534 | 0.3241   |
| H | -4.72323 | -0.90092 | 1.10711  |
| H | -4.37589 | -0.92349 | -0.65002 |

|   |          |          |          |
|---|----------|----------|----------|
| H | -4.20422 | -2.42263 | 0.31741  |
| C | -0.84127 | 2.94129  | -0.47464 |
| C | -0.90296 | 2.08426  | 0.72013  |
| C | 1.32321  | 2.13966  | 0.08947  |
| C | 0.55831  | 2.91573  | -0.96146 |
| H | -1.6861  | 3.39842  | -0.97387 |
| H | 0.97426  | 3.53953  | -1.74024 |
| C | 0.48431  | 2.11555  | 1.36676  |
| H | 0.67543  | 1.23564  | 1.98242  |
| H | 0.62157  | 3.02158  | 1.96481  |
| C | -0.79521 | 1.13882  | -0.47121 |
| H | -1.61935 | 0.86858  | -1.11745 |
| C | 0.61703  | 1.34678  | -0.97948 |
| H | 1.07312  | 0.79244  | -1.78885 |
| H | -1.81686 | 2.04498  | 1.30314  |
| H | 2.40579  | 2.18159  | 0.09229  |

**Product**

**at 23 °C**

|                                              |             |
|----------------------------------------------|-------------|
| Sum of electronic and zero-point Energies=   | -837.742846 |
| Sum of electronic and thermal Energies=      | -837.727879 |
| Sum of electronic and thermal Enthalpies=    | -837.726941 |
| Sum of electronic and thermal Free Energies= | -837.784989 |

**at 0 °C**

|                                              |             |
|----------------------------------------------|-------------|
| Sum of electronic and zero-point Energies=   | -837.742846 |
| Sum of electronic and thermal Energies=      | -837.729903 |
| Sum of electronic and thermal Enthalpies=    | -837.729038 |
| Sum of electronic and thermal Free Energies= | -837.780566 |

|   |          |          |          |
|---|----------|----------|----------|
| N | -0.86782 | -0.08938 | 0.12526  |
| N | 0.26752  | -0.66578 | -0.5433  |
| C | 0.96785  | -1.67745 | 0.07806  |
| O | 0.51514  | -2.3975  | 0.96359  |
| O | 2.18365  | -1.80922 | -0.47872 |
| C | -2.10943 | -0.6484  | -0.11171 |
| O | -2.2982  | -1.81367 | -0.44621 |
| O | -3.07634 | 0.24729  | 0.14757  |
| C | 3.01025  | -2.88343 | 0.03582  |
| H | 3.93478  | -2.82654 | -0.53673 |
| H | 3.20877  | -2.72705 | 1.09781  |
| H | 2.52096  | -3.84587 | -0.12551 |
| C | -4.43979 | -0.22941 | 0.02019  |
| H | -5.06312 | 0.63299  | 0.25147  |
| H | -4.62315 | -0.57148 | -0.99999 |

|   |          |          |          |
|---|----------|----------|----------|
| H | -4.62406 | -1.03557 | 0.73287  |
| C | 0.77068  | 3.32825  | -0.01743 |
| C | 0.08258  | 2.23063  | 0.79229  |
| C | 1.94723  | 1.32866  | -0.14089 |
| C | 1.87237  | 2.79329  | -0.57225 |
| H | 0.36523  | 4.32092  | -0.18119 |
| H | 2.5461   | 3.25941  | -1.28317 |
| C | 1.31745  | 1.42861  | 1.27129  |
| H | 1.07448  | 0.46733  | 1.73237  |
| H | 1.94268  | 2.004    | 1.95778  |
| C | -0.48285 | 1.2979   | -0.3119  |
| H | -1.23008 | 1.75239  | -0.9595  |
| C | 0.79194  | 0.68254  | -0.96129 |
| H | 0.91771  | 0.74599  | -2.0404  |
| H | -0.64698 | 2.54765  | 1.53781  |
| H | 2.91508  | 0.83959  | -0.24018 |

**in methanol at 23 °C**

**Quadricyclane(QDC)**

|                                              |             |
|----------------------------------------------|-------------|
| Sum of electronic and zero-point Energies=   | -271.347081 |
| Sum of electronic and thermal Energies=      | -271.342482 |
| Sum of electronic and thermal Enthalpies=    | -271.341544 |
| Sum of electronic and thermal Free Energies= | -271.374767 |

|   |          |          |          |
|---|----------|----------|----------|
| C | -0.77567 | -0.71043 | -0.75923 |
| C | -1.15454 | 0.55156  | 0.00004  |
| C | 1.15427  | 0.55199  | -0.00011 |
| C | 0.77584  | -0.71004 | -0.75937 |
| H | -1.42817 | -1.2331  | -1.44912 |
| H | 1.42866  | -1.23285 | -1.44884 |
| C | -0.00037 | 1.54016  | -0.00003 |
| H | -0.00022 | 2.18064  | 0.8907   |
| H | -0.00059 | 2.18146  | -0.89015 |
| C | -0.77555 | -0.71035 | 0.75938  |
| H | -1.42794 | -1.23312 | 1.4493   |
| C | 0.77602  | -0.70997 | 0.75927  |
| H | 1.42882  | -1.2325  | 1.44897  |
| H | -2.19084 | 0.87524  | -0.00029 |
| H | 2.19024  | 0.87675  | -0.00029 |

**Dimethyl azodicarboxylate(DMAD)**

|                                            |             |
|--------------------------------------------|-------------|
| Sum of electronic and zero-point Energies= | -566.306828 |
| Sum of electronic and thermal Energies=    | -566.296090 |
| Sum of electronic and thermal Enthalpies=  | -566.295153 |

Sum of electronic and thermal Free Energies= -566.344818

|   |          |          |          |
|---|----------|----------|----------|
| N | -0.42398 | 0.03141  | 0.65706  |
| N | 0.35196  | 0.04365  | -0.31068 |
| C | 1.7233   | -0.27999 | 0.08738  |
| O | 2.0122   | -1.15543 | 0.87405  |
| O | 2.53444  | 0.48648  | -0.61108 |
| C | -1.7848  | 0.35854  | 0.28614  |
| O | -2.24909 | 1.44312  | 0.5686   |
| O | -2.38233 | -0.67031 | -0.27241 |
| C | 3.96356  | 0.30689  | -0.38827 |
| H | 4.44171  | 1.02446  | -1.05224 |
| H | 4.20056  | 0.52215  | 0.65516  |
| H | 4.24404  | -0.71525 | -0.64919 |
| C | -3.79424 | -0.50705 | -0.61234 |
| H | -4.09467 | -1.47165 | -1.01687 |
| H | -4.36133 | -0.26699 | 0.28855  |
| H | -3.89477 | 0.28062  | -1.36079 |

#### Transition state

Sum of electronic and zero-point Energies= -837.634641  
Sum of electronic and thermal Energies= -837.618529  
Sum of electronic and thermal Enthalpies= -837.617591  
Sum of electronic and thermal Free Energies= -837.679458

|   |          |          |          |
|---|----------|----------|----------|
| N | -0.52944 | -0.91827 | 0.30715  |
| N | 0.4612   | -1.36194 | -0.42292 |
| C | 1.68677  | -1.28152 | 0.24524  |
| O | 1.90028  | -1.01816 | 1.42804  |
| O | 2.6666   | -1.63038 | -0.61685 |
| C | -1.78715 | -1.36941 | -0.18438 |
| O | -1.99261 | -2.08524 | -1.1554  |
| O | -2.74687 | -0.94393 | 0.64915  |
| C | 4.00232  | -1.70927 | -0.0748  |
| H | 4.63454  | -2.00517 | -0.91201 |
| H | 4.3178   | -0.73677 | 0.31142  |
| H | 4.04585  | -2.46026 | 0.71827  |
| C | -4.10163 | -1.33205 | 0.32365  |
| H | -4.72111 | -0.8818  | 1.09872  |
| H | -4.3813  | -0.94585 | -0.65956 |
| H | -4.19827 | -2.42008 | 0.34349  |
| C | -0.83425 | 2.94673  | -0.46786 |
| C | -0.90541 | 2.07878  | 0.71801  |

|   |          |         |          |
|---|----------|---------|----------|
| C | 1.32397  | 2.12892 | 0.09854  |
| C | 0.56738  | 2.91792 | -0.94938 |
| H | -1.67512 | 3.41117 | -0.96801 |
| H | 0.9904   | 3.54884 | -1.71915 |
| C | 0.47874  | 2.09494 | 1.37186  |
| H | 0.65995  | 1.20524 | 1.97719  |
| H | 0.61916  | 2.99272 | 1.98243  |
| C | -0.79553 | 1.14022 | -0.4789  |
| H | -1.61833 | 0.87813 | -1.13084 |
| C | 0.61887  | 1.35062 | -0.98233 |
| H | 1.07548  | 0.79852 | -1.79349 |
| H | -1.82214 | 2.03726 | 1.29714  |
| H | 2.40712  | 2.16584 | 0.10737  |

### Product

|                                              |             |
|----------------------------------------------|-------------|
| Sum of electronic and zero-point Energies=   | -837.746896 |
| Sum of electronic and thermal Energies=      | -837.731841 |
| Sum of electronic and thermal Enthalpies=    | -837.730904 |
| Sum of electronic and thermal Free Energies= | -837.789443 |

|   |          |          |          |
|---|----------|----------|----------|
| N | -0.86432 | -0.07197 | 0.12595  |
| N | 0.2724   | -0.65853 | -0.52203 |
| C | 0.95166  | -1.68589 | 0.09189  |
| O | 0.48666  | -2.39973 | 0.97489  |
| O | 2.16308  | -1.83699 | -0.46781 |
| C | -2.10396 | -0.63294 | -0.11719 |
| O | -2.28748 | -1.79363 | -0.46549 |
| O | -3.07128 | 0.25659  | 0.15131  |
| C | 2.96263  | -2.94323 | 0.01889  |
| H | 3.88942  | -2.89403 | -0.55171 |
| H | 3.1655   | -2.82202 | 1.08508  |
| H | 2.45085  | -3.88974 | -0.1681  |
| C | -4.4344  | -0.21787 | 0.01938  |
| H | -5.05745 | 0.6436   | 0.25735  |
| H | -4.61921 | -0.55231 | -1.00361 |
| H | -4.62052 | -1.02955 | 0.72604  |
| C | 0.79651  | 3.33444  | -0.03744 |
| C | 0.0879   | 2.25154  | 0.77494  |
| C | 1.95881  | 1.32449  | -0.12171 |
| C | 1.90212  | 2.78481  | -0.56961 |
| H | 0.40167  | 4.32884  | -0.21864 |
| H | 2.58999  | 3.23837  | -1.27582 |
| C | 1.30882  | 1.44452  | 1.28019  |
| H | 1.04948  | 0.49034  | 1.748    |

|   |          |         |          |
|---|----------|---------|----------|
| H | 1.92895  | 2.0217  | 1.97049  |
| C | -0.47037 | 1.30881 | -0.32482 |
| H | -1.20967 | 1.75727 | -0.98662 |
| C | 0.81024  | 0.677   | -0.9525  |
| H | 0.9513   | 0.72709 | -2.03119 |
| H | -0.64898 | 2.58346 | 1.50724  |
| H | 2.9245   | 0.82646 | -0.20132 |
